# Supplementary material for: High-yield synthesis of HMF from glucose and fructose by selective catalysis with water-tolerant rare earth metal triflates assisted by choline chloride
Source: Royal Society of Chemistry journal article supplement (doi:10.1039/d2gc04046h), 2023-01-01

## Electronic supplementary information

### **High yield synthesis of HMF from glucose and fructose by selective catalysis with water-tolerant rare earth metal triflates assisted by choline chloride**

Fabrizio Olivito,<sup>\*a</sup> Vincenzo Algieri,<sup>a</sup> Matteo Antonio Tallarida,<sup>a</sup> Antonio Jiritano,<sup>a</sup> Paola Costanzo,<sup>a</sup> Loredana Maiuolo,<sup>a</sup> Antonio De Nino<sup>\*a</sup>

<sup>a</sup> *Department of Chemistry and Chemical Technologies, Via P. Bucci, Cubo 12C, University of Calabria, Rende (CS), Italy.*

## Table of Contents

|    |                                                                                                                                         |     |
|----|-----------------------------------------------------------------------------------------------------------------------------------------|-----|
| 1. | Reagents                                                                                                                                | S3  |
| 2. | Solvents                                                                                                                                | S3  |
| 3. | Catalysts                                                                                                                               | S3  |
| 4. | Mass spectra of the optimized reaction using different catalysts                                                                        | S4  |
| 5. | <sup>1</sup> H NMR spectra of the HMF obtained without any purification                                                                 | S12 |
| 6. | <sup>13</sup> C NMR spectra of glucose, choline chloride and mixture Glucose/Sc(OTf) <sub>3</sub> /Choline Chloride in D <sub>2</sub> O | S14 |

### 1. Reagents

$\alpha$ -D-(+)-glucose : Sigma Aldrich 96%

D-(-)-fructose : Sigma Aldrich 99%

Choline chloride : Alfa Aesar 98%

## **2. Solvents**

Methyl ethyl ketone : Alfa Aesar 98.5%

Methyl propyl ketone : Sigma Aldrich 99%

## **3. Catalysts**

Aluminium chloride hexahydrate: Sigma Aldrich 99.9%

Iron(III) chloride hexahydrate: 99% Fluka

Zinc chloride anhydrous: Alfa Aesar 98%

Erbium chloride hexahydrate: Alfa Aesar 99.9%

Ytterbium chloride anhydrous: 99.9 Alfa Aesar

Scandium(III) trifluoromethanesulfonate : Sigma Aldrich 99%

Cerium chloride heptahydrate: Sigma Aldrich 99.9%

Holmium(III) trifluoromethanesulfonate : Sigma Aldrich 98%

Erbium(III) trifluoromethanesulfonate : Sigma Aldrich 98%

## **4. Mass spectra of the optimized reaction using different catalysts**

#### 4.1 Optimized reaction starting from glucose using $\text{AlCl}_3 \cdot 6\text{H}_2\text{O}$ , (HMF yield = 35%)

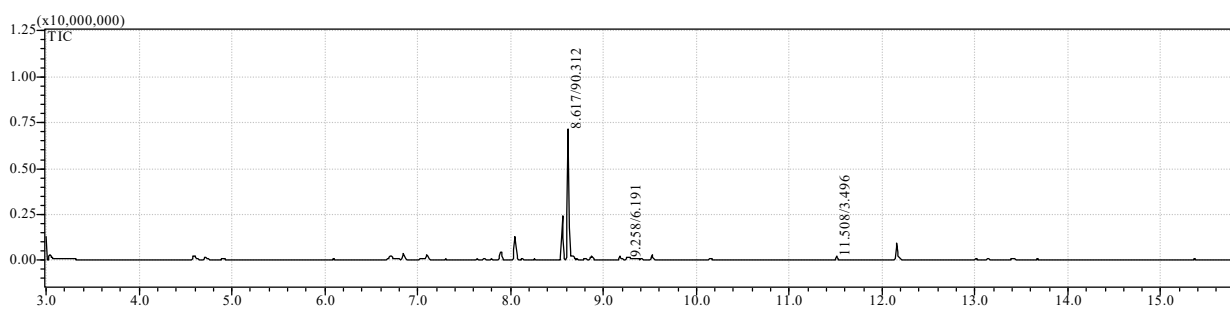

Retention time: 8.558

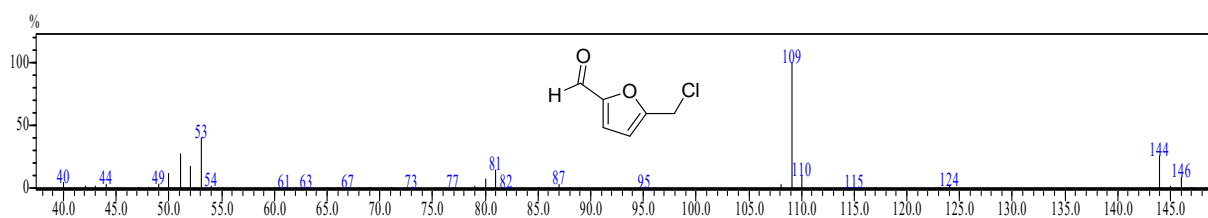

Retention time: 9.250

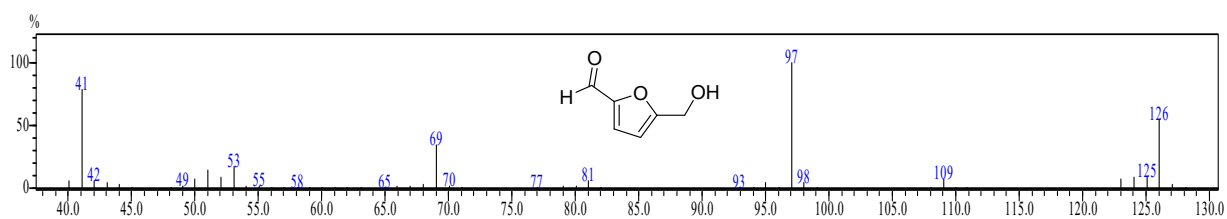

Retention time: 11.508

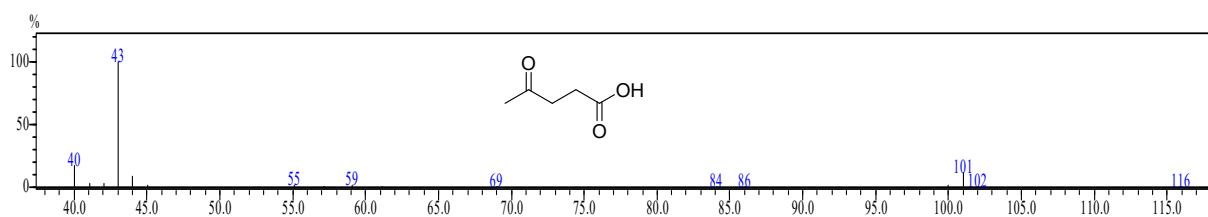

#### 4.2 Optimized reaction starting from glucose using $\text{CeCl}_3 \cdot 7\text{H}_2\text{O}$ (HMF yield = 55%)

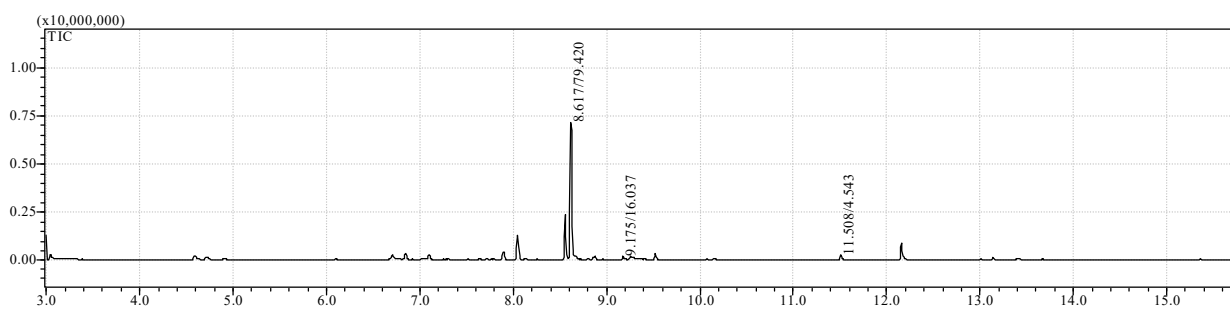

Retention time: 8.543

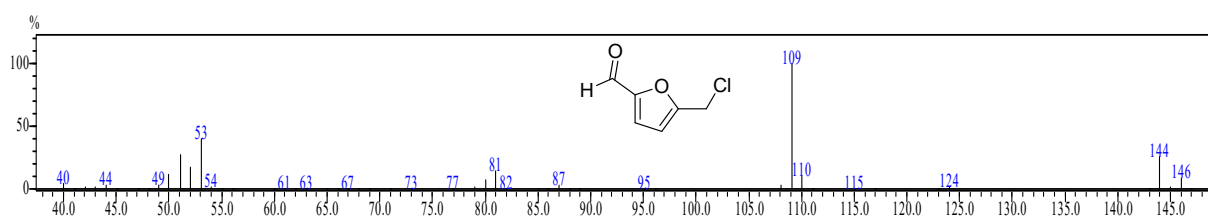

Retention time: 9.261

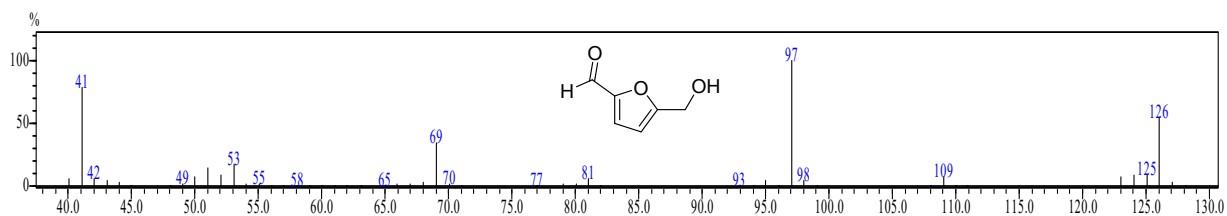

Retention time: 11.510

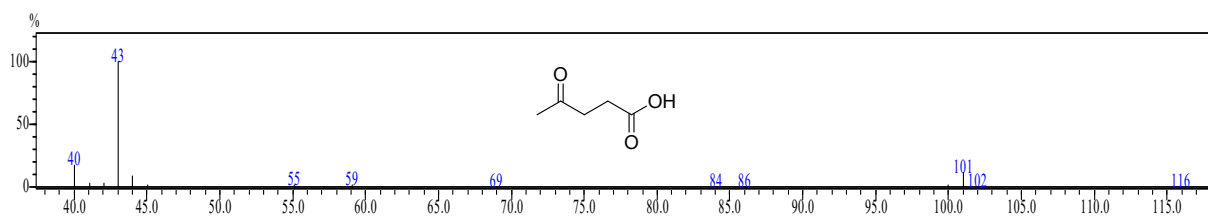

4.3 Optimized reaction starting from glucose using  $\text{ErCl}_3 \cdot 6\text{H}_2\text{O}$ , (HMF yield = 65%)

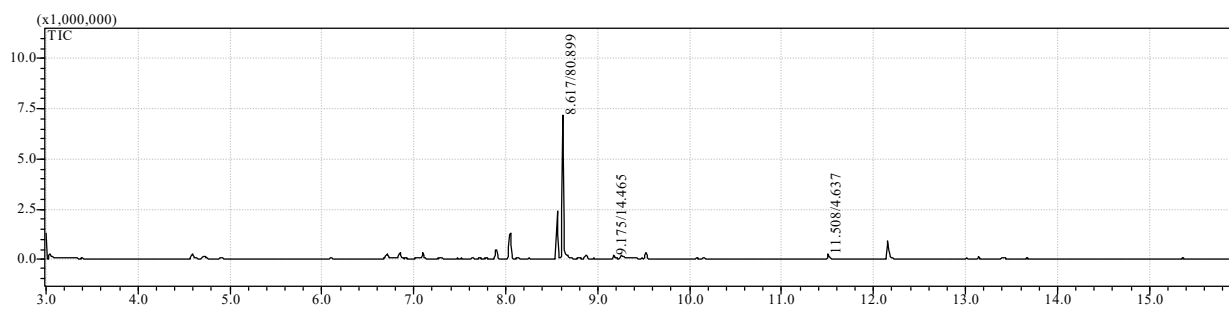

Retention time: 8.560

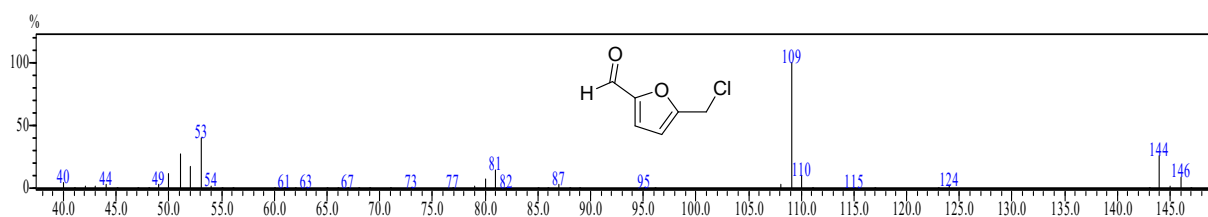

Retention time: 9.255

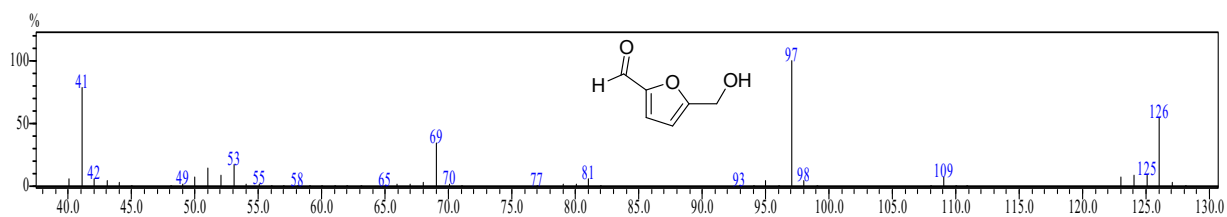

Retention time: 11.505

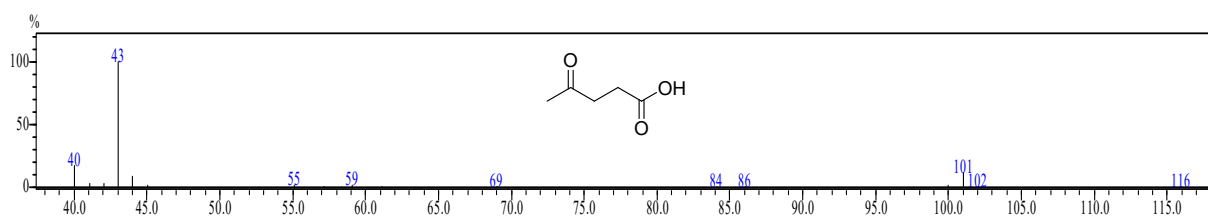

4.4 Optimized reaction starting from glucose using  $\text{Fe(III)Cl}_3 \cdot 6\text{H}_2\text{O}$ , (HMF yield = 45%)

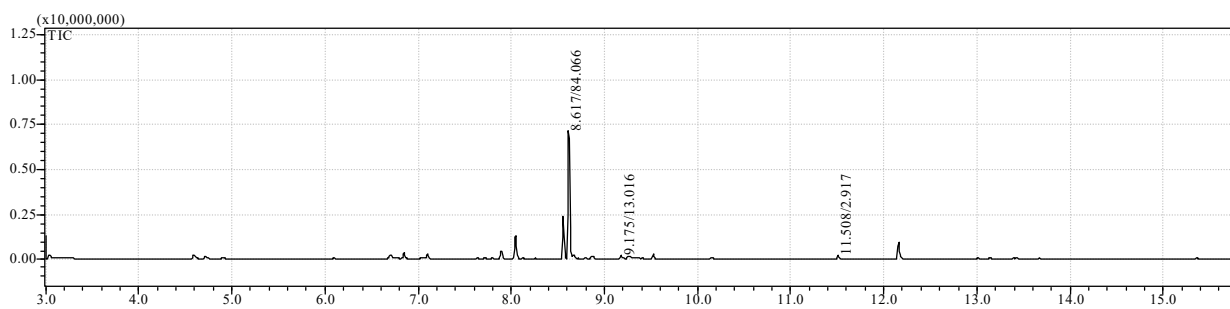

Retention time: 8.552

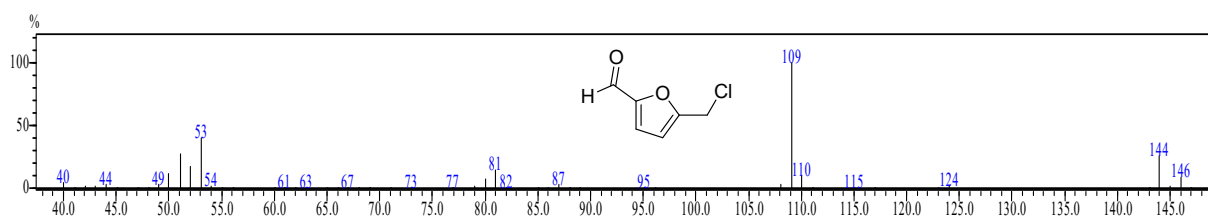

Retention time: 9.258

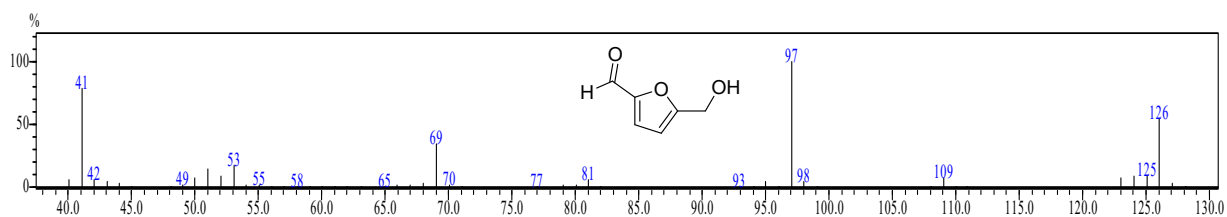

Retention time: 11.503

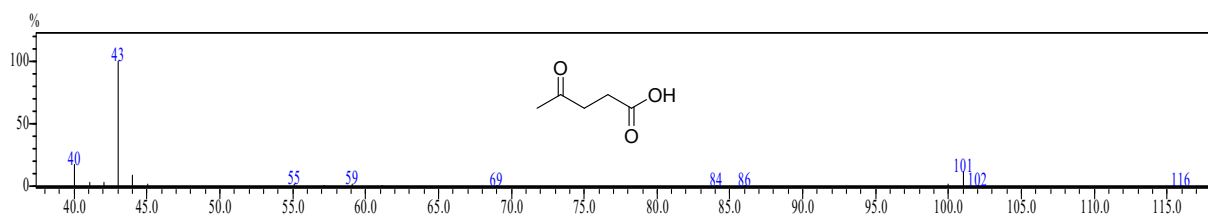

4.5 Optimized reaction starting from glucose using ZnCl<sub>2</sub> anhydrous, (HMF yield = 22%)

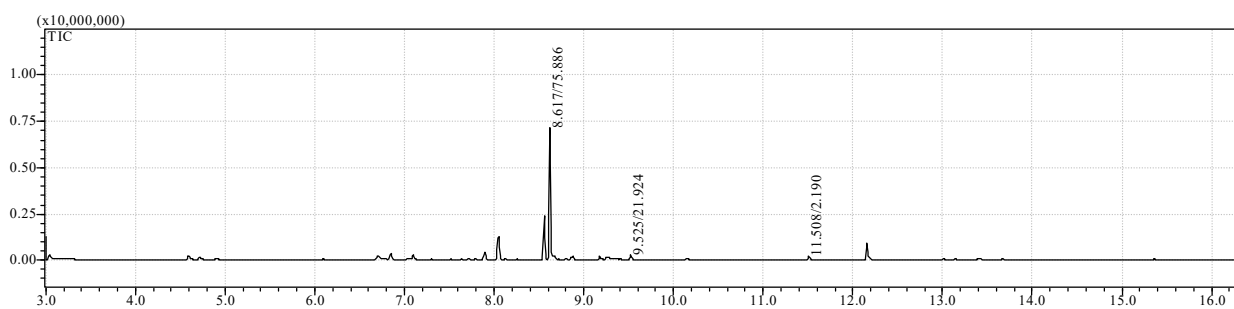

Retention time: 8.560

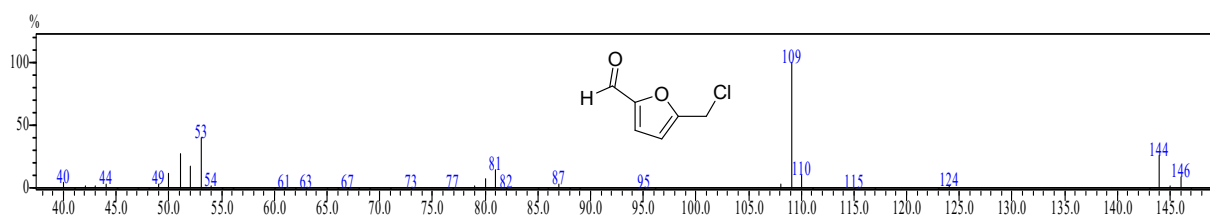

Retention time: 9.258

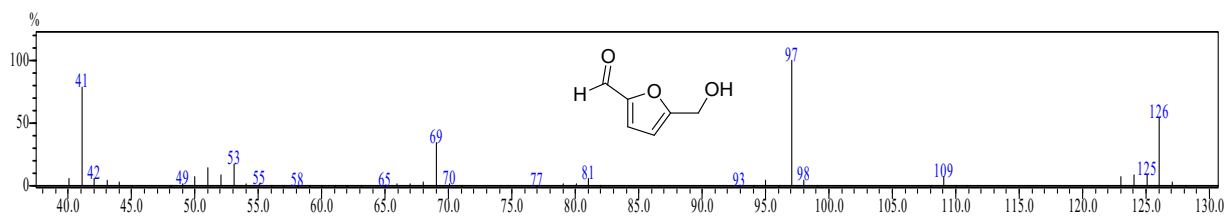

Retention time: 11.506

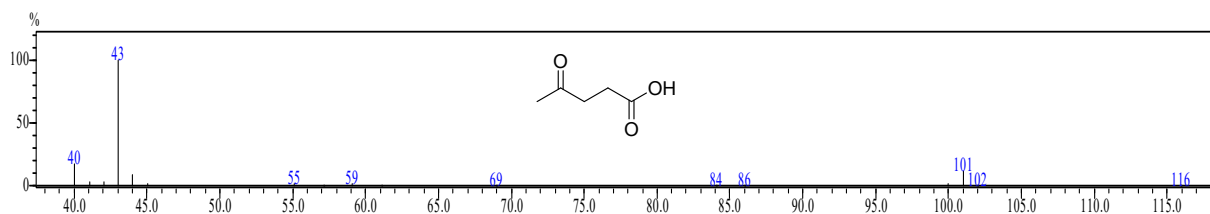

4.6 Optimized reaction starting from glucose using  $\text{La(III)(OTf)}_3$



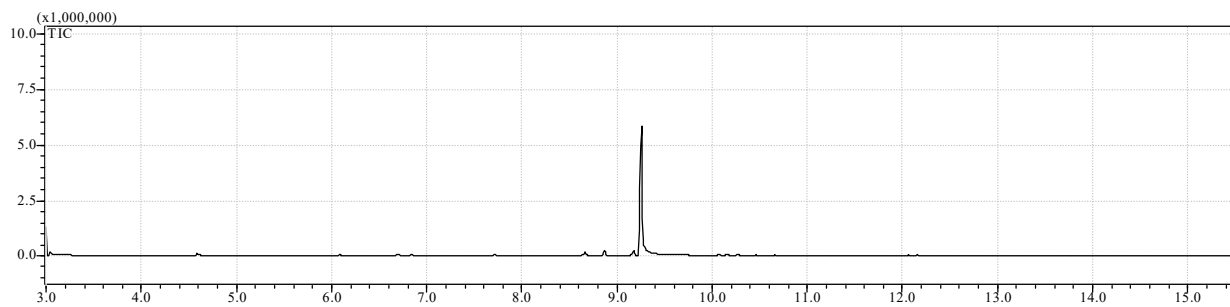

Retention time = 9.259

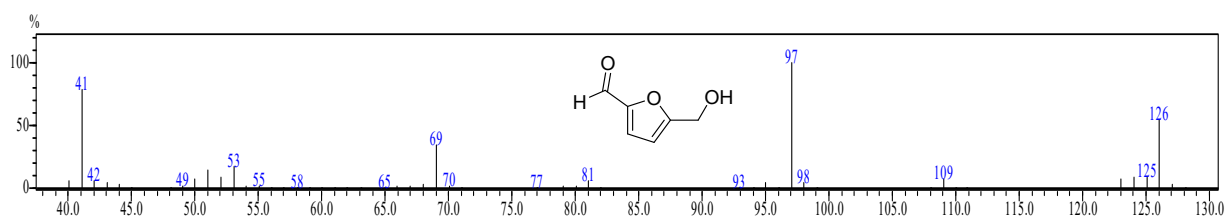

4.7 Optimized reaction starting from glucose using  $\text{Ce(III)(OTf)}_3$

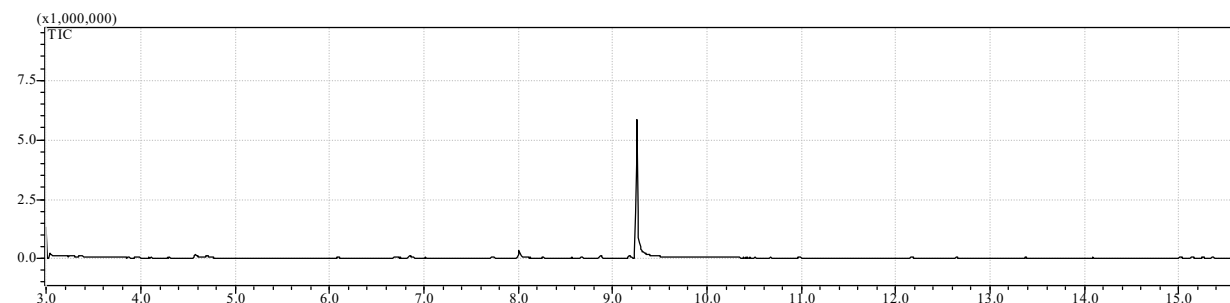

Retention time = 9.25

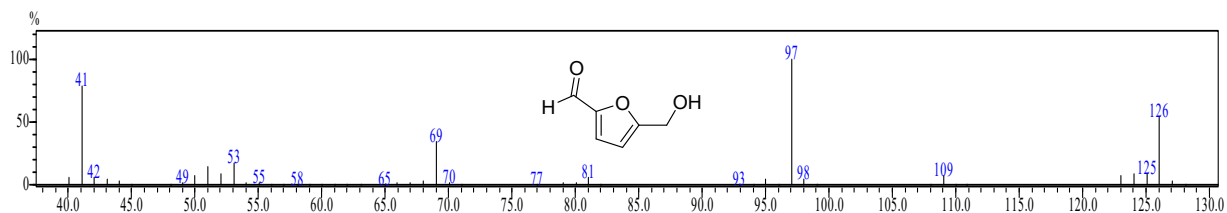

4.8 Optimized reaction starting from glucose using  $\text{Ho(III)(OTf)}_3$

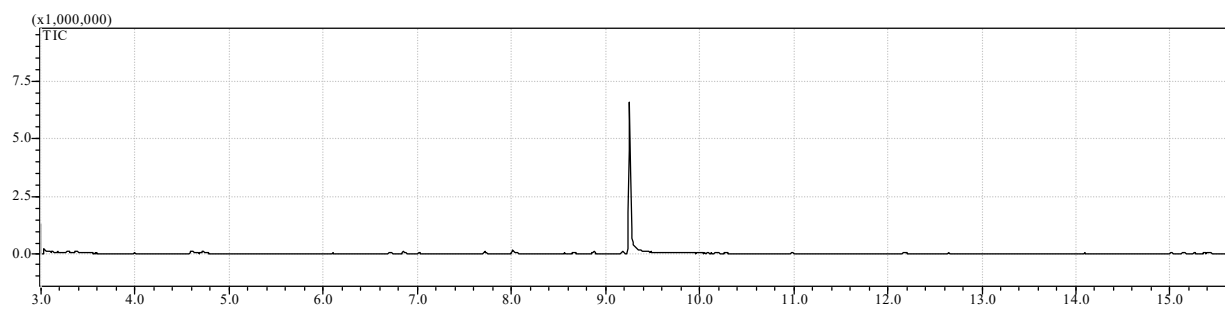

Retention time = 9.250

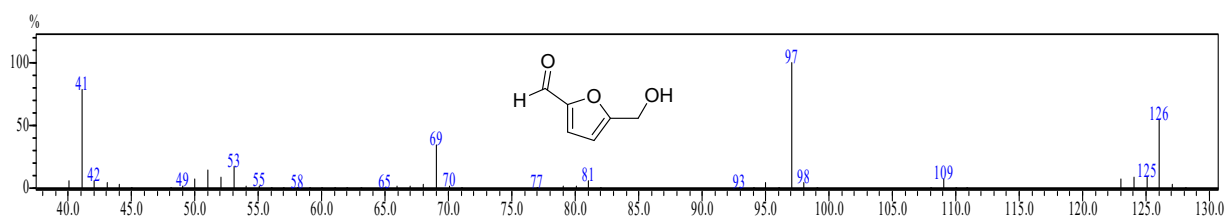

#### 4.9 Optimized reaction starting from glucose using Er(III)(OTf)<sub>3</sub>

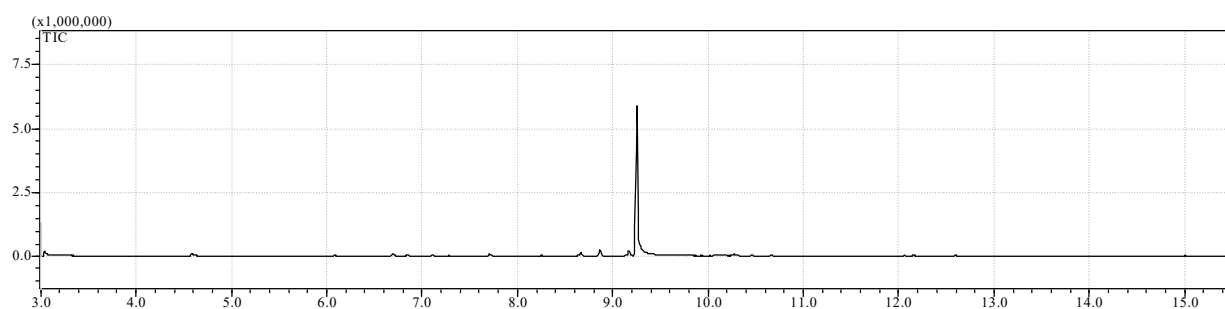

Retention time = 9.257

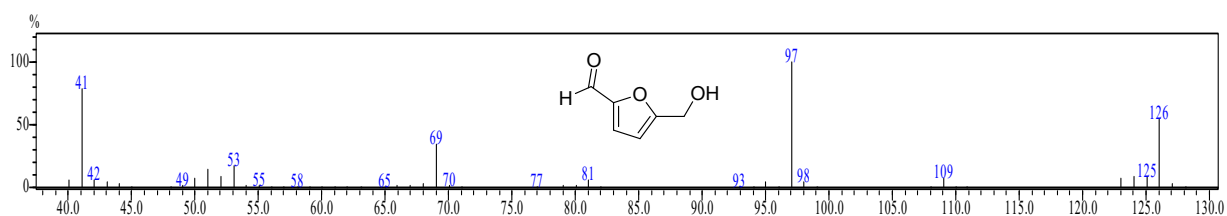

#### 4.10 Optimized reaction starting from glucose using Yb(III)(OTf)<sub>3</sub>



Retention time = 9.253

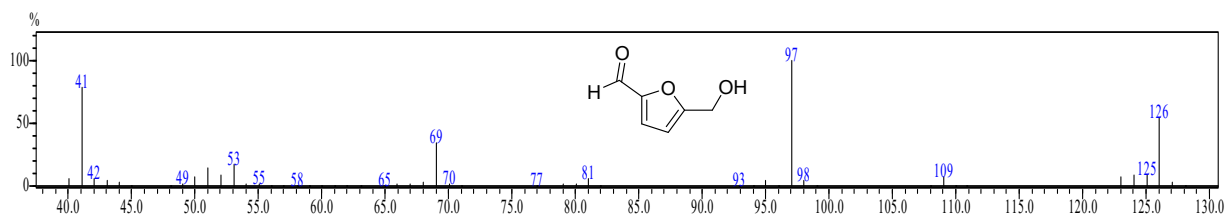

#### 4.11 Optimized reaction starting from glucose using $\text{Sc(III)(OTf)}_3$

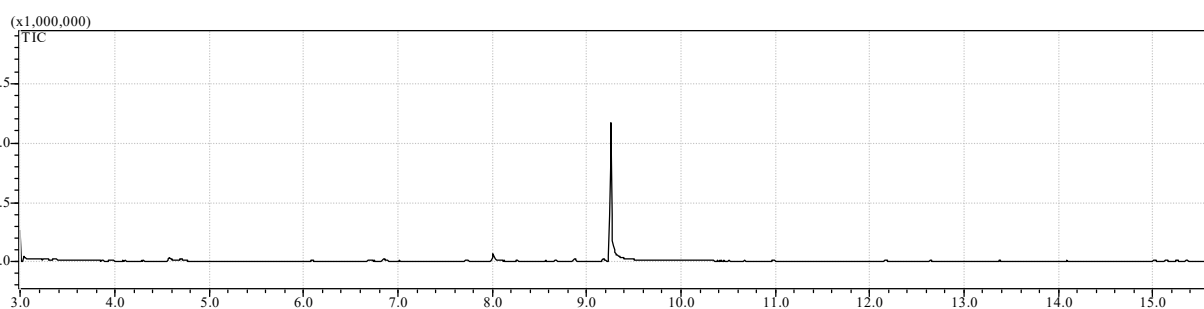

Retention time = 9.251

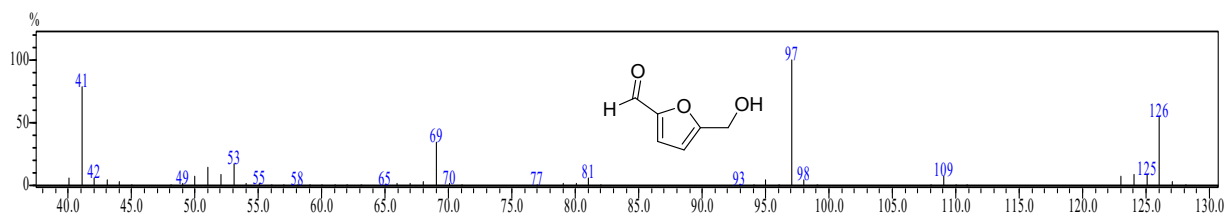

#### 5. $^1\text{H}$ NMR spectra of the HMF obtained without any purification

(in CDCl<sub>3</sub> and TMS as reference)

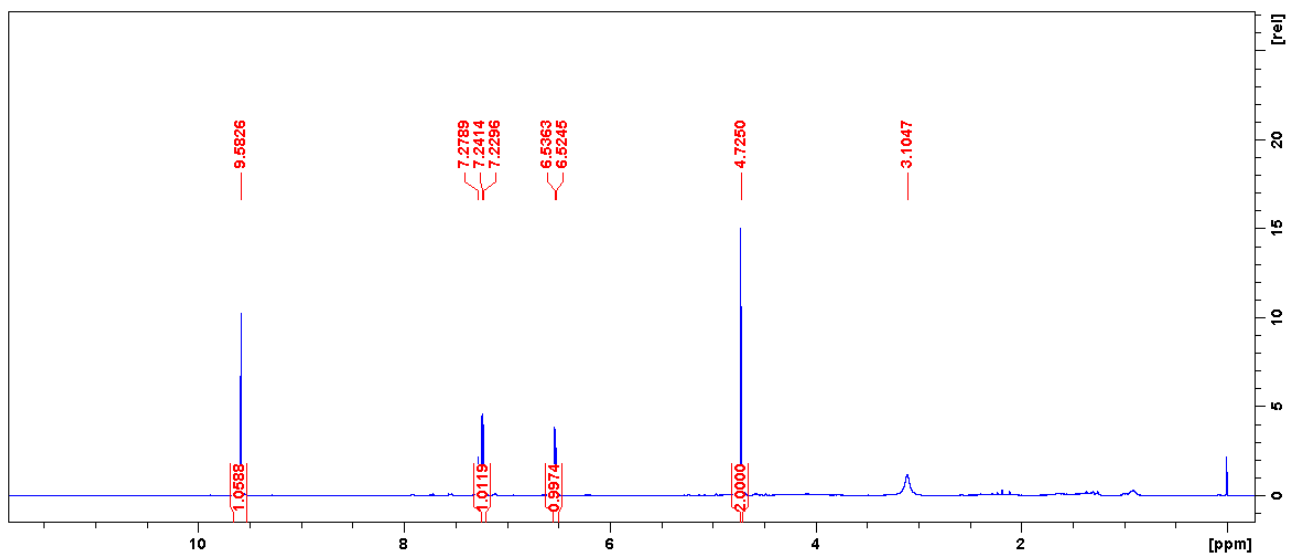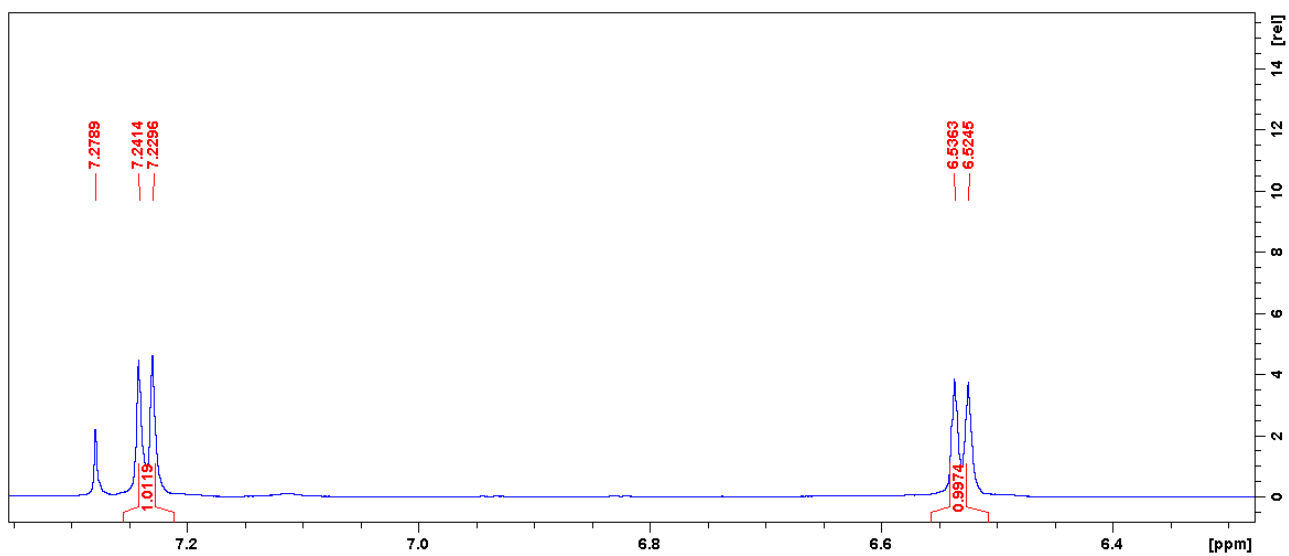

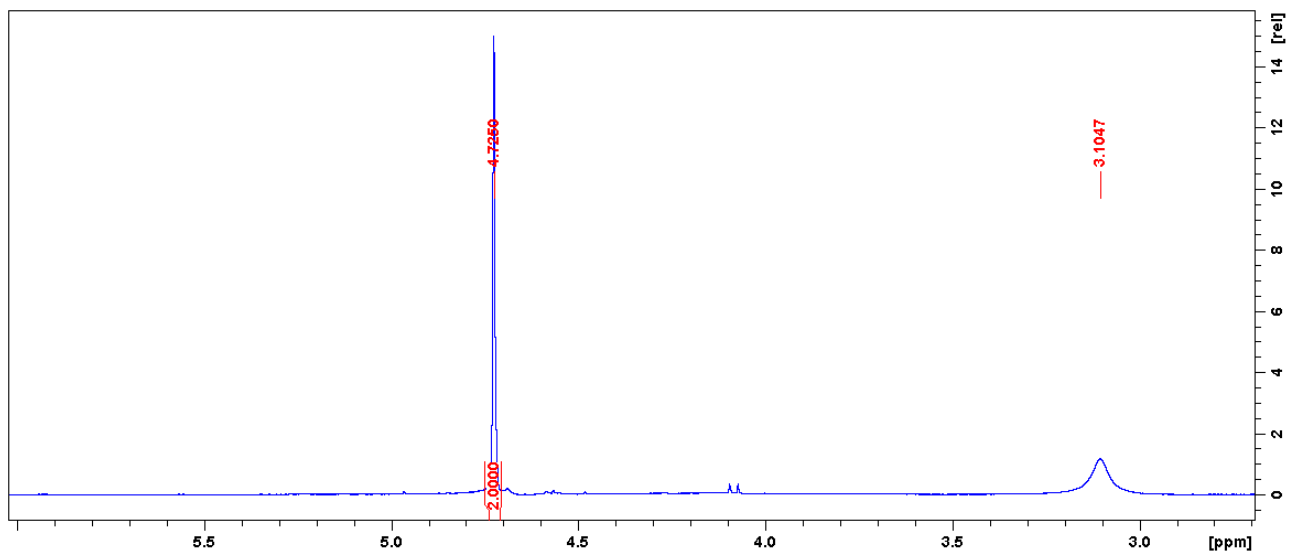

## 6. $^{13}\text{C}$ NMR spectra of glucose, choline chloride and mixture Glucose/ $\text{Sc}(\text{OTf})_3$ /Choline Chloride in $\text{D}_2\text{O}$

### $^{13}\text{C}$ NMR Glucose

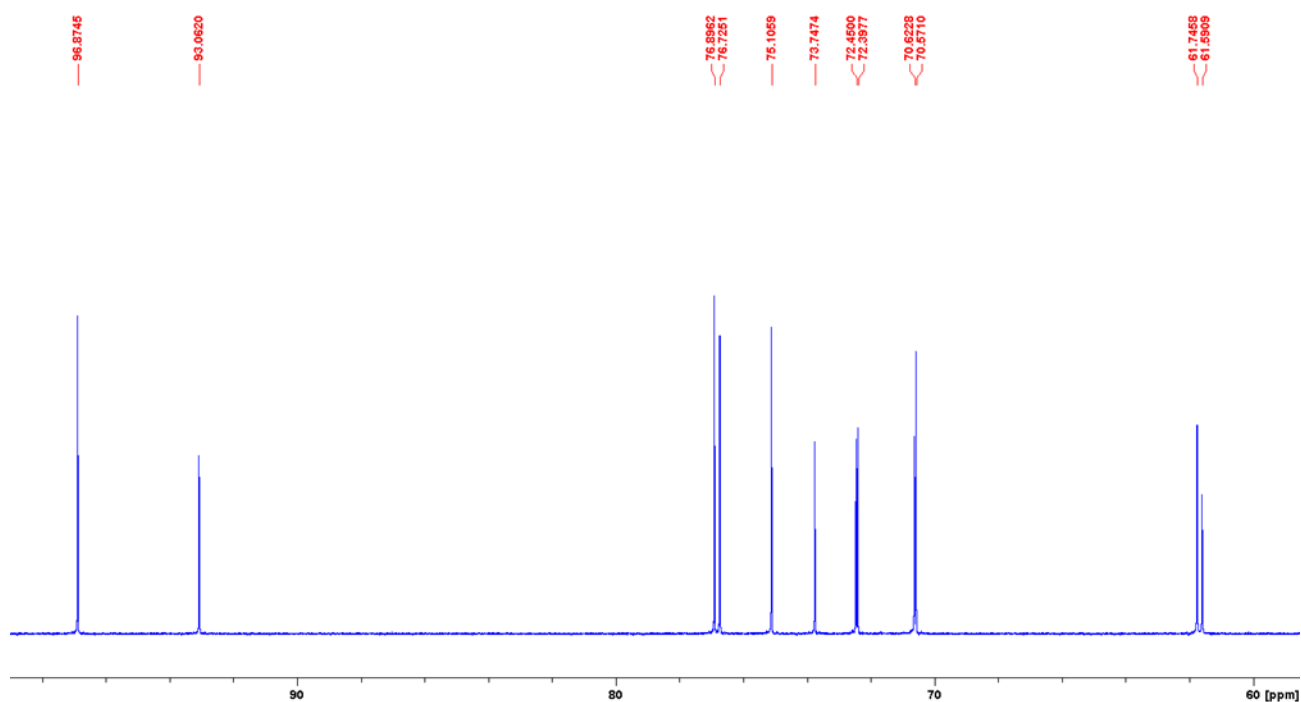

### $^{13}\text{C}$ NMR of Choline Chloride

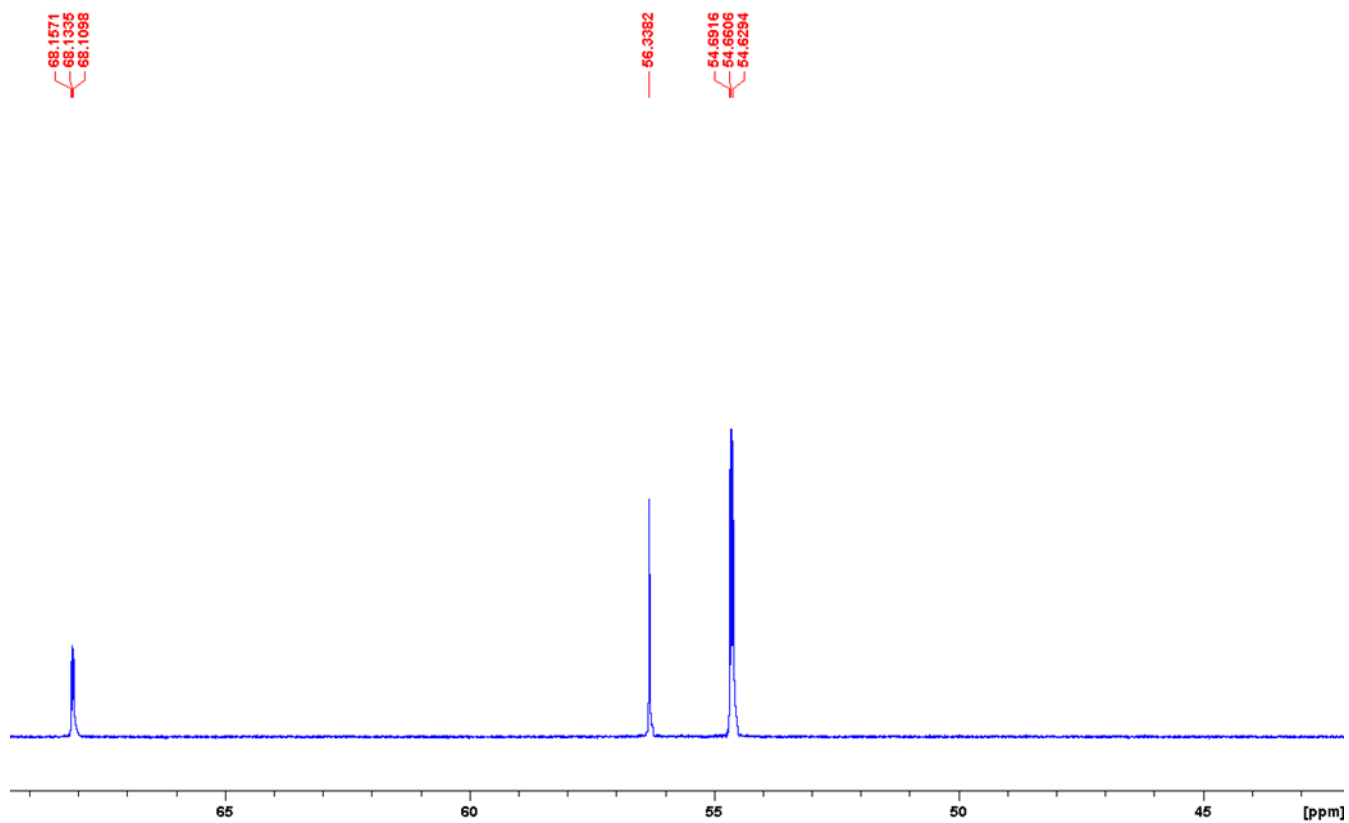

<sup>13</sup>C NMR of mixture Glucose/Sc(OTf)<sub>3</sub>/Choline Chloride<sup>a</sup>

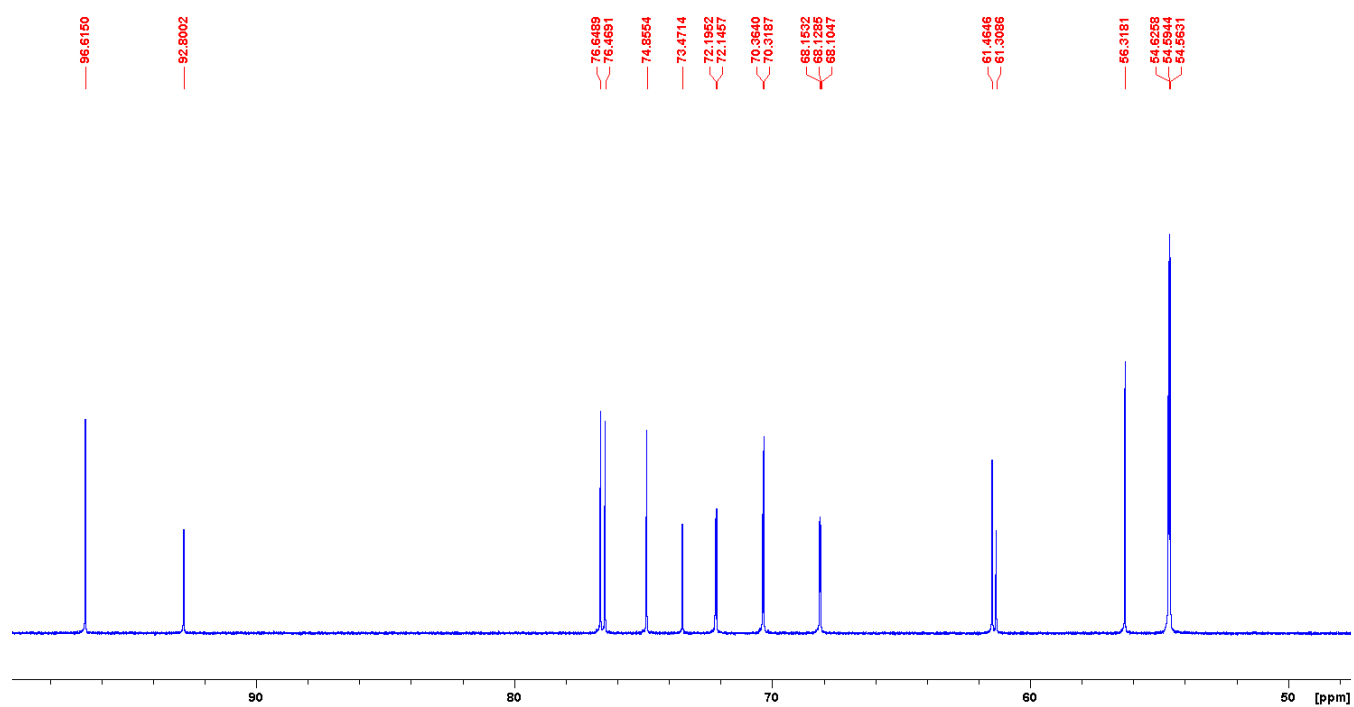

<sup>a</sup> The mixture was prepared by using same molar ratio described in the manuscript.

Dual display of  $^{13}\text{C}$  NMR of Glucose (red) and  $^{13}\text{C}$  NMR of mixture Glucose/ $\text{Sc}(\text{OTf})_3$ /Choline Chloride (blu) with magnification of region of anomeric carbon

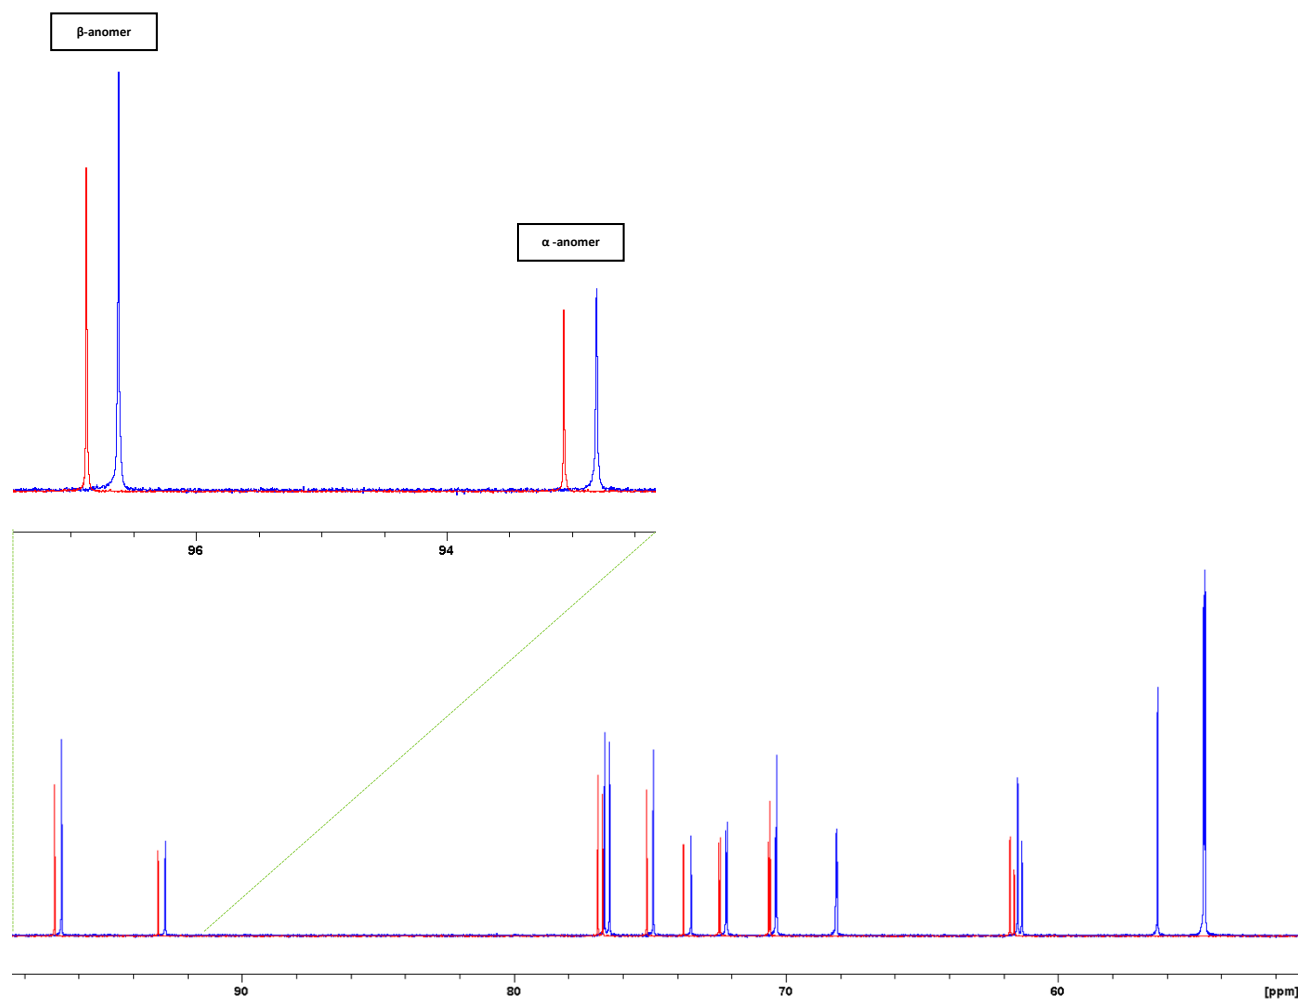

Supplement: d2gc04046h1.pdf [file d2gc04046h1.pdf]
